# Supplementary material
Source: HighWire-hosted journal article supplement (https://www.jpn.ca/highwire/filestream/89746/field_highwire_adjunct_files/0/jpn-120207-1-at.pdf)
Supplement: jpn-120207-1-at.pdf [file jpn-120207-1-at.pdf]

DOI: 10.1503/jpn.120207

Copyright © 2013 The Author(s) or their employer(s). To receive this resource in an accessible format, please contact us at [cmajgroup@cmaj.ca](mailto:cmajgroup@cmaj.ca).

**Table S1: Association of cognitive test scores and symptom severity in 50 patients with schizophrenia**

|                                                                                                                        | Group; coefficient*, <i>p</i> value |      |                   |       |                  |       |
|------------------------------------------------------------------------------------------------------------------------|-------------------------------------|------|-------------------|-------|------------------|-------|
| Variable                                                                                                               | Positive symptoms                   |      | Negative symptoms |       | General symptoms |       |
| BACS                                                                                                                   |                                     |      |                   |       |                  |       |
| Composite score                                                                                                        | −0.235,                             | 0.11 | −0.432,           | 0.002 | −0.288,          | 0.047 |
| Verbal memory                                                                                                          | −0.118,                             | 0.43 | −0.353,           | 0.014 | −0.163,          | 0.27  |
| Working memory                                                                                                         | −0.058,                             | 0.70 | −0.296,           | 0.041 | −0.148,          | 0.32  |
| Motor speed                                                                                                            | −0.271,                             | 0.06 | −0.306,           | 0.035 | −0.253,          | 0.08  |
| Word fluency                                                                                                           | −0.065,                             | 0.66 | −0.372,           | 0.009 | −0.156,          | 0.29  |
| Attention processing speed                                                                                             | −0.166,                             | 0.26 | −0.402,           | 0.005 | −0.168,          | 0.25  |
| Executive function                                                                                                     | −0.196,                             | 0.18 | −0.104,           | 0.482 | −0.137,          | 0.35  |
| BACS = Brief Assessment of Cognition in Schizophrenia.<br>*Partial correlations controlled with age and sex were used. |                                     |      |                   |       |                  |       |

**Model 1**

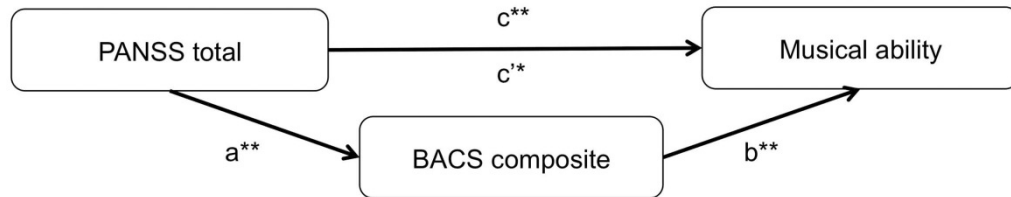

**Model 2**

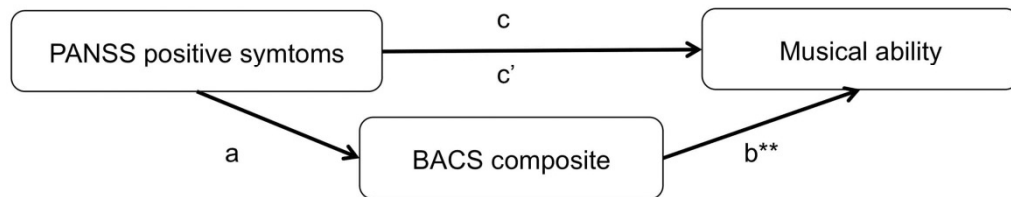

**Model 3**

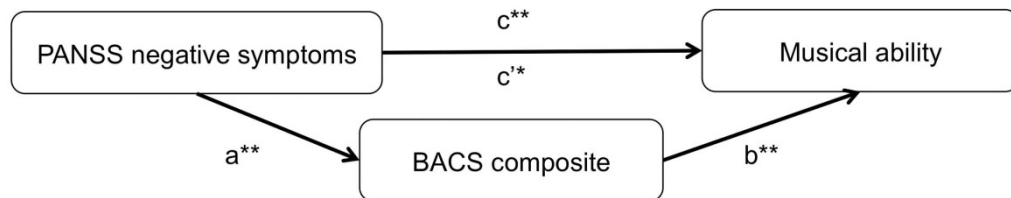

**Fig. S1: Model 1** shows the total effect (*c*) of the Positive and Negative Syndrome Scale (PANSS) total score on musical ability made up of a direct effect without accounting for the Brief Assessment of Cognition in Schizophrenia (BACS) composite score (*c'*) and an indirect effect via the cognitive composite score (*ab*). **Models 2 and 3** are based on a multiple predictor variable study using the PANSS scores for positive and negative symptoms. The figure shows the total effect (*c*) and direct effect (*c'*) of each PANSS symptoms score on musical ability. \**p* < 0.05; \*\**p* < 0.01.
